# Supplementary material for: Long-term evaluation of commercial air quality sensors: an overview from the QUANT (Quantification of Utility of Atmospheric Network Technologies) study
Source: Copernicus journal article supplement (doi:10.5194/amt-17-3809-2024), 2024-06-26
Supplement: Supplementary file 1 [file amt-17-3809-2024-supplement.pdf]

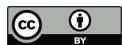

*Supplement of*

**Long-term evaluation of commercial air quality sensors: an overview from the QUANT (Quantification of Utility of Atmospheric Network Technologies) study**

**Sebastian Diez et al.**

*Correspondence to:* Sebastian Diez ([sebastian.diez@udd.cl](mailto:sebastian.diez@udd.cl)) and Pete M. Edwards ([pete.edwards@york.ac.uk](mailto:pete.edwards@york.ac.uk))

The copyright of individual parts of the supplement might differ from the article licence.

## 1 **S1. Co-location sites**

2 For the main QUANT deployment, 3 field sites were chosen: Manchester, London, and York, all providing  
3 extensive reference measurements across a range of chemical environments representative of UK urban  
4 atmospheres. On the other hand, only the Manchester site was used for the WPS colocation.

5 The Manchester Air Quality Supersite (MAQS, 53° 26' 39.2"N, 2° 12' 51.9"W) stands as one of the largest air  
6 quality research facilities in the UK. Situated in an urban background setting approximately four kilometres south  
7 of Manchester city center — the UK's second-largest metropolitan area with around 3.3 million residents —  
8 MAQS benefits from a strategic location on the University of Manchester's Fallowfield Campus. This location is  
9 notably distanced from direct traffic emissions, surrounded by student accommodations, university administrative  
10 buildings, and sports facilities. The campus's vicinity to shops, bars, and restaurants introduces a range of human  
11 activities, including varying levels of foot traffic and associated vehicular movement. Additionally, the presence  
12 of these commercial and recreational spaces, alongside residential buildings, contributes to the area's ambient air  
13 quality through emissions from heating and cooking, among other sources. For a visual representation of MAQS's  
14 surroundings, please refer to Figure S1 (panel a). The site experiences an average winter temperature of  
15 approximately 4-5°C with relative humidity around 87%, and an average summer temperature of about 16-17°C  
16 with relative humidity near 88%. Detailed information on MAQS's reference instrumentation and the  
17 methodologies employed for air quality measurements can be found in section S2. Data from MAQS are provided  
18 with a 1-minute time resolution, facilitating a granular temporal analysis of air quality metrics.

19 The London Air Quality Supersite (LAQS, 51° 26' 58.9"N 0° 02' 14.6"W) serves as an urban background  
20 monitoring site, nestled within Honor Oak Park in Greater London. Situated 9 km southeast of the city center of  
21 the third-largest European urban conglomeration, LAQS offers a unique window into the air quality challenges of  
22 an area inhabited by approximately 14.8 million people. Nestled within the serene King's College sports grounds,  
23 is surrounded by middle-class neighbourhoods, abundant parks, and green spaces. This tranquil setting, is  
24 distanced from major roads and pollution sources, provides a representative snapshot of the ambient air quality  
25 typical of residential London. LAQS's surroundings are marked by a low level of commercial activity, with local  
26 shops and restaurants contributing minimally to the area's overall noise and bustle. Figure S1 (panel b) offers an  
27 aerial view of LAQS, illustrating the overall urban layout. The area is characterised by a temperate climate,  
28 experiencing average winter temperatures of around 5°C with RH of approx. 84%, and milder summers with  
29 temperatures averaging 17°C and RH of around 72%. Gas measurements at LAQS are conducted with a 1-minute  
30 time resolution, while PM data are collected at a 15-minute resolution (see section S2 for more details).

31 The York Fishergate roadside site (YoFi, 53° 57' 06.9"N, 1° 04' 33.1"W), in the historic city of York, which is  
32 home to approximately 210,000 inhabitants (avg. temp. in winter of ~4°C and RH ~87 %, avg. temp. in summer  
33 around 15 °C and RH ~80 %). Situated just about 1 km from the city center on a traffic island, YoFi stands amidst  
34 a predominantly residential area that also encompasses commercial and light industrial elements. Unique to its  
35 location, the site is sandwiched between two lanes of Fishergate Road, a major avenue that bifurcates to facilitate  
36 traffic flow into and out of the city's southern part. Directly across from YoFi, a primary school adds to the daily  
37 human activity around the site, while the nearby River Ouse, located merely 300 metres to the west, contributes  
38 to the area's environmental characteristics. A vibrant commercial zone, featuring pubs and restaurants, is found

39 just 100 metres to the north. Moreover, the site is flanked by Walmgate Stray, an expanse of recreational fields,  
40 located about 300 metres to the southeast, offering a green respite amidst the urban setting. Additional details can  
41 be visualised in Figure S1 (panel c), providing an aerial perspective of the site's key features and its urban context.  
42 This self-contained air quality monitoring station was specifically selected for the QUANT study to assess sensors'  
43 responses to the greater pollutant variability typical of traffic-related sites, contrasting with the urban background  
44 settings of MAQS and LAQS. YoFi provides data on PM and NO<sub>x</sub> with a 1-hour time resolution. Additionally,  
45 in a targeted effort to enhance our understanding of air quality dynamics, O<sub>3</sub> measurements (deployed on the 15th  
46 of May 2020, specifically as part of the QUANT study), utilising a 1-minute time resolution to offer detailed  
47 insights into temporal variations (refer to section S2 for more details).

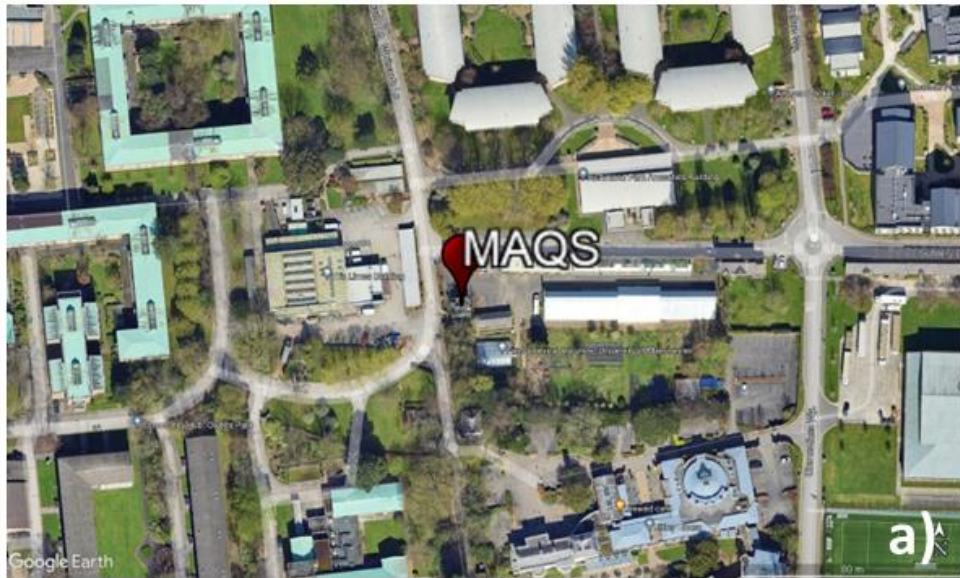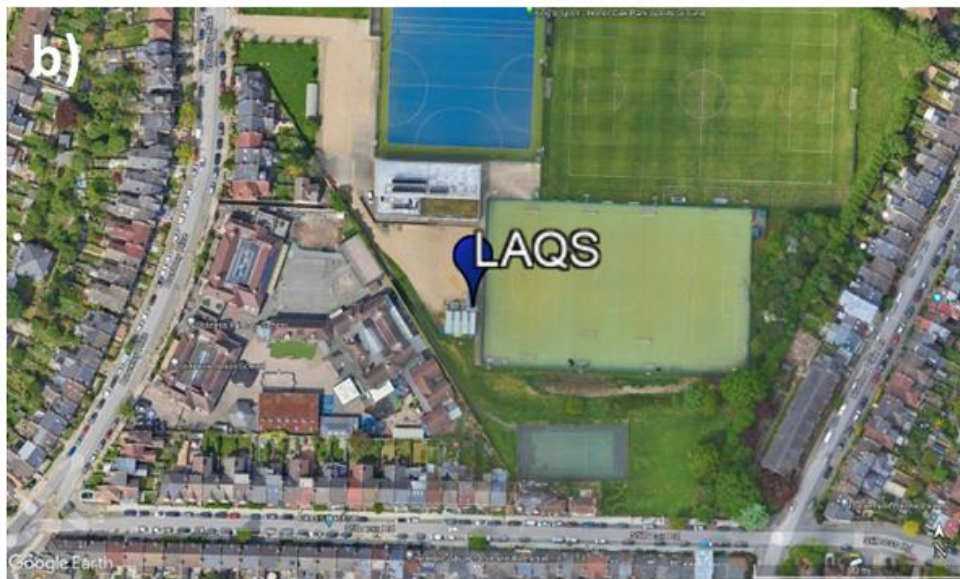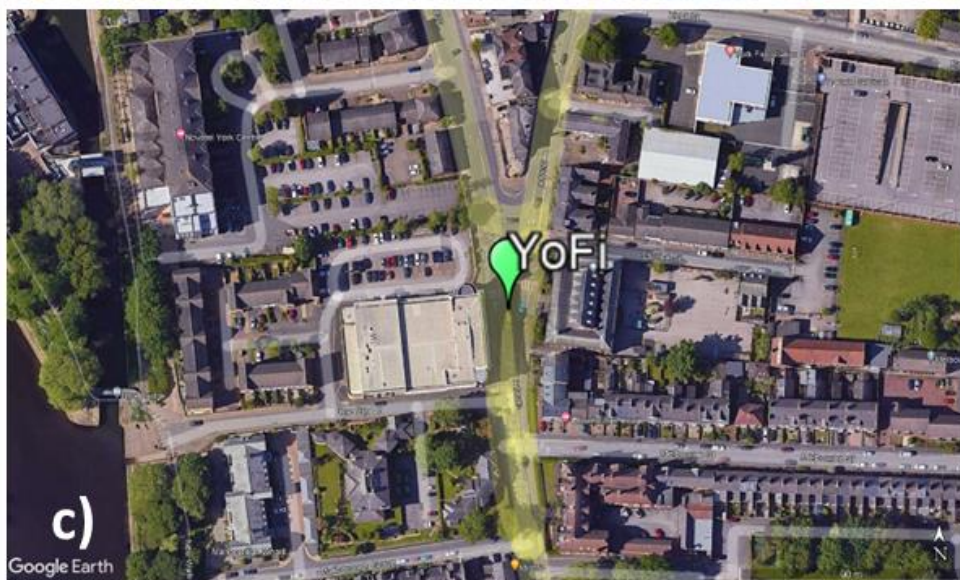

49 **Figure S1: Aerial views of the air quality monitoring sites: a) MAQS, b) LAQS, and c) YoFi, captured from Google**  
 50 **Earth. These images illustrate the diverse urban settings of each site, emphasising aspects such as their proximity to**  
 51 **traffic sources, presence of green spaces, and the general urban layout. Image credits: © Google Earth.**

52 **S2. Reference instrumentation, QA/QC, and data-sharing periods**

53 Table S1 summarises the reference instrumentation at each site, Table S2 describes some of the QA/QC processes  
 54 at the supersites, and Table S3 shows the data periods shared with the suppliers.

55 **Table S1. Research grade instrumentation used for the QUANT study.**

| Analyte         | Manchester                | London                    | York                         |
|-----------------|---------------------------|---------------------------|------------------------------|
| NO              | Thermo 42i-y<br>(Chem)    | Teledyne T200U<br>(Chem)  | Teledyne T200UP<br>(Chem)    |
| NO <sub>2</sub> | *Teledyne T500U<br>(CAPS) | *Teledyne T500U<br>(CAPS) |                              |
| O <sub>3</sub>  | *Thermo 49i<br>(UV)       | *Teledyne 400E<br>(UV)    | *2B 205<br>(UV)              |
| PM              | *Palas FIDAS200<br>(OAS)  | *Palas FIDAS200<br>(OAS)  | *Met One BAM<br>1020<br>(BA) |

56 \*Equivalent to reference (as defined in the European Air Quality Directive 2008/50/EC)

57 Acronyms: Chem: Chemiluminescence; CAPS: Cavity Attenuated Phase Shift Spectroscopy; UV: Ultraviolet; OAS:  
 58 Optical aerosol spectrometer; BA: Beta attenuation.

59 **Table S2. Summary of Quality Assurance processes in MAQS and LAQS**

| Instrument                          | Frequency                   | *Process                                                                                                                     |
|-------------------------------------|-----------------------------|------------------------------------------------------------------------------------------------------------------------------|
| NO <sub>y</sub>                     | At least monthly            | Zero and span checks using standard cylinder and scrubber. Corrections to zero and span values.                              |
| NO <sub>2</sub>                     | Daily                       | Automatic zero and span checks using internal NO <sub>2</sub> diffusion tube and scrubber. Zero corrections, span monitored. |
| O <sub>3</sub>                      | Daily                       | Automatic zero and span checks using internal O <sub>3</sub> lamp and scrubber. Corrections to zero, span monitored.         |
| CO                                  | Every three hours & monthly | Zero checks every three hours and span checks monthly using onsite cylinder. Adjustments to zero and span values.            |
| CO <sub>2</sub> and CH <sub>4</sub> | Regular                     | Stability checks using onsite cylinder, no corrections made.                                                                 |
| *PM                                 | Semiannual                  | Sizing response verified with Mono dust, flow rate checked with Gilibrator.                                                  |

60 \*Checked with external standards by NPL every 6 months. These external standards are also used to provide a certification of the on-site  
 61 standard cylinders. Final corrections to the data are provided by using the audit data to define the concentration of the on-site standards, with  
 62 zero and span values interpolated between the calibration points.

63 \*\*Sizing and flow checked every 6-month NPL audit process.1

64 **Table S3. Reference data is shared with the sensor manufacturers.**

| QUANT main study  |                         |            | Wider Participation Study |                         |            |
|-------------------|-------------------------|------------|---------------------------|-------------------------|------------|
| Reference dataset | Period                  | Released   | Reference dataset         | Period                  | Released   |
| 1                 | 10-12-2019 - 17-02-2020 | 15-04-2020 | 1                         | 17-06-2021 - 16-07-2021 | 23-07-2021 |
| 2                 | 18-02-2020 - 17-08-2020 | 27-10-2020 | 2                         | 01-12-2021 - 31-12-2021 | 26-01-2022 |
| 3                 | 18-08-2020 - 17-02-2021 | 15-04-2021 | 3                         | 01-05-2022 - 31-05-2022 | 15-06-2022 |

65 **S3. QUANT main study devices**

66 In this section, a brief description of the QUANT main study systems' components is offered.

67 PurpleAir (PA) (<https://www2.purpleair.com>) devices (PA-II-SD model, firmware v4.11) reports particulate  
68 matter (PM<sub>1</sub>, PM<sub>2.5</sub>, and PM<sub>10</sub>), and it was chosen for its penetration around the world. Two identical Plantower  
69 PMS5003 (Plantower) sensors (channels A and B) are found in each PA. It offers two data products (2-min avg.  
70 time): the “cf\_atm” (for outdoor applications) and the “cf\_1” (for indoor or controlled environment applications).  
71 The PMS behaves like a nephelometer rather than an optical particle counter to measure the light scattered by the  
72 PM (Ouimette et al., 2022) and is composed of a laser, a photodiode, a fan, and a microprocessor control unit.  
73 They also measure temperature (Temp), relative humidity (RH), and atmospheric pressure (Pres) (Bosch). The  
74 data can be communicated via Wi-Fi or stored locally (microSD card), which was the preferred way during the  
75 collocation. No calibrated products are offered by the company.

76 \*Note: For this study, only Channel A and the data product “cf\_atm” were included in the analysis and shown in  
77 the plots.

78 AQMesh (<https://www.aqmesh.com>) reports NO<sub>2</sub>, NO, O<sub>3</sub> using electrochemical (EC) sensors (Alphasense), CO<sub>2</sub>  
79 with a non-dispersive infrared sensor (NDIR, Alphasense), PM<sub>1</sub>, PM<sub>2.5</sub>, and PM<sub>10</sub> through a light-scattering sensor  
80 (Nephelometer, Environmental Instr.) with 1-minute time resolution (algorithm v5.1 for gases and v3.0 for PM).  
81 This instrument also registers Temp, RH, and Pres (Solid-State sensors) (Zauli-Sajani et al., 2022) and the  
82 sampling mechanism employs a pump. The collected data is sent to the company server via a cellular network and  
83 post-processed (Temp, RH, and cross-interference correction) in the cloud by a proprietary algorithm. Finally, the  
84 data is released to the final user via secure web login or through its Application Programming Interface (API).  
85 Although the first 4 months of the deployment the data had a 15-min resolution, since then the provided resolution  
86 is 1-min average.

87 AQY (v.1.0) is also a multi-species device (<https://www.aeroqual.com>) and measures O<sub>3</sub>, NO<sub>2</sub>, PM<sub>2.5</sub>, PM<sub>10</sub>,  
88 Temp, and RH. This is the only device system that does not use Alphasense sensors for gases. While O<sub>3</sub> is  
89 quantified using a metal oxide sensor (WO<sub>3</sub>-based, Aeroqual Ltd), the NO<sub>2</sub> is measured by an EC sensor  
90 (Membrapore type O<sub>3</sub>/M5, Aeroqual Ltd) (Weissert et al., 2019). For PM it uses a light scattering method (Nova)  
91 to convert size and particle count to a mass fraction and behaves like a nephelometer (Myklebust et al., 2022).

92 These LCS devices send their data (1-min time resolution) to the Aeroqual server via cellular (WiFi could also be  
 93 used for this purpose) or stored locally (microSD card). The non-local data access is through a web portal or via  
 94 API.

95 Zephyr units (<https://www.earthsense.co.uk>) measure PM (Nephelometer, Plantower), Temp & RH (Sensirion),  
 96 and Press (Bosch) (the sample uptake uses a fan). As most of the commercial units tested here, it used Alphasense  
 97 EC sensors (the “A series”, a smaller version than the B series) for gases (NO, NO<sub>2</sub>, and O<sub>3</sub>). These devices send  
 98 their raw data to the server via a cellular network, where they pre-process the raw signals. We have secure access  
 99 to the measurements with a time resolution of 1-min per species through the website or via its API.

100 ARIsense v200 devices (<https://quant-aq.com>) measure NO, NO<sub>2</sub>, O<sub>3</sub>, CO (EC, Alphasense), CO<sub>2</sub> (NDIR,  
 101 Alphasense), Temp & RH (Sensirion), and Press (Bosch) (Cross et al., 2017). Of all the devices tested, this is the  
 102 only one that uses an Optical Particle Counter (OPC) for PM (Particles Plus). Communication is carried out  
 103 through a cellular network and the data products are accessed through a web portal or API (1-minute time  
 104 resolution). According to the company policy, only the gas data products are subjected to calibrations (if  
 105 colocation data is available).

106 **Table S4. Summary of sensor measurements and the time resolution data provided by participating companies in the**  
 107 **Main QUANT study.**

| <b>System</b> | <b>Measurands</b>                                                                                                      | <b>Time Resol.</b> |
|---------------|------------------------------------------------------------------------------------------------------------------------|--------------------|
| PA            | PM <sub>1</sub> , PM <sub>2.5</sub> , PM <sub>10</sub>                                                                 | 2min               |
| AQM           | PM <sub>1</sub> , PM <sub>2.5</sub> , PM <sub>10</sub> ,<br>NO, NO <sub>2</sub> , O <sub>3</sub> , CO <sub>2</sub>     | 1min/15min         |
| AQY           | PM <sub>2.5</sub> , PM <sub>10</sub> ,<br>NO <sub>2</sub> , O <sub>3</sub>                                             | 1min               |
| Zep           | PM <sub>1</sub> , PM <sub>2.5</sub> , PM <sub>10</sub> ,<br>NO, NO <sub>2</sub> , O <sub>3</sub>                       | 1min               |
| Ari           | PM <sub>1</sub> , PM <sub>2.5</sub> , PM <sub>10</sub> ,<br>NO, NO <sub>2</sub> , O <sub>3</sub> , CO; CO <sub>2</sub> | 1min               |

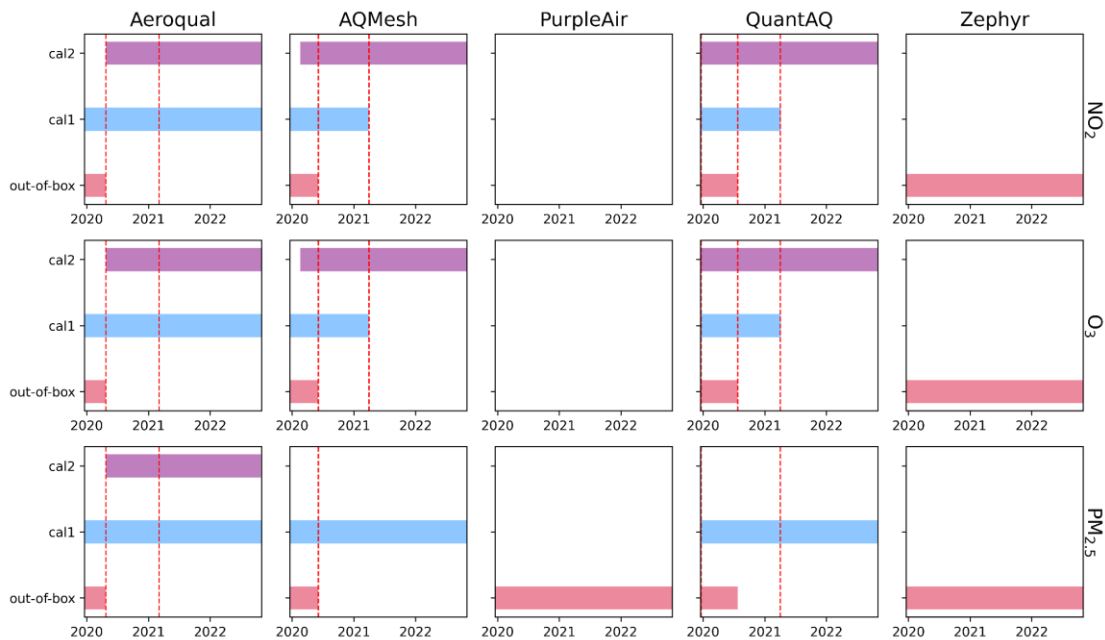

108

109 **Figure S2. Data product for each of the participating companies during Main QUANT. The top panels are for NO<sub>2</sub>,**  
 110 **the middle panels for O<sub>3</sub> and the bottom panels for PM<sub>2.5</sub>. The y-axis represents the different products: “out-of-**  
 111 **box”, cal1 and cal2. The x-axis shows the dates for which each company provided the mentioned products.**

112 **S4. WPS devices**

113 A short description of the WPS devices' components is shown in this section

114 Modulair-PM instruments (<https://quant-aq.com>) employ two different techniques to obtain PM mass  
 115 concentration (it samples the air using a fan), an OPC (Alphasense, OPC-N3) and a nephelometer (Plantower,  
 116 PMS5003). This system provides 1-min time resolution data for PM<sub>1</sub>, PM<sub>2.5</sub>, and PM<sub>10</sub>, plus size-resolved particle  
 117 number concentration (range 350 nm to 40 μm) (Meyer et al., 2022; Westgate and Ng, 2022). Temp, RH, and  
 118 Press are also measured, but no data was found about the sensing elements it uses. The post-processed data can  
 119 be accessed locally (microSD card) or through its server (cellular network comm) via its web portal or API.

120 AQMesh (see earlier description).

121 The Atmos device (<http://urbansciences.in/>) reports PM<sub>1</sub>, PM<sub>2.5</sub>, PM<sub>10</sub> (Plantower, PMS7003) plus Temp and RH  
 122 (Adafruit), employing a fan as a means to sample the air. The system transmits the data (1-min time resolution)  
 123 to a cloud server (only via Wi-Fi) and also stores it locally (Puttaswamy et al., 2022). The data can be accessed  
 124 via a web dashboard or API. Unfortunately, and due to the meteorological conditions at the Manchester supersite  
 125 these co-located devices only survived for about 2 months.

126 The IMB instrument (<https://www.bosch-mobility-solutions.com>) measures NO<sub>2</sub>, O<sub>3</sub> PM<sub>2.5</sub> and PM<sub>10</sub>,  
 127 (Alphasense sensors), plus Press, RH an Temp (no details were found about the brand and model). The raw data  
 128 is transmitted to their cloud using cellular connectivity (3G or LTE). The final data is 1-min resolution (accessed  
 129 only via API).



130 Polludrone (<https://oizom.com>) uses Alphasense sensors for gas measurements (B4 series for NO, NO<sub>2</sub>, O<sub>3</sub>. No  
 131 data available about CO, CO<sub>2</sub> and SO<sub>2</sub>) and a Wuhan Cubic PM3006S for PM (PM<sub>2.5</sub> and PM<sub>10</sub>) (Oizom -  
 132 Polludrone Smart, 2023). It also registers RH and Temp, but no data was found in regards to sensor model/brand.  
 133 The sampling mechanism uses a fan and data transmission is wireless. The final product (time res is 10-min) can  
 134 be obtained through the Oizom webpage and/or via API.

135 Kunak Air Pro (<https://www.kunak.es/>) uses a fan for sampling and all sensors are from Alphasense (EC, B series  
 136 for CO, NO, NO<sub>2</sub> and O<sub>3</sub>; an NDIR sensor for CO<sub>2</sub>; and an OPC-N3 for PM<sub>1</sub>, PM<sub>2.5</sub>, and PM<sub>10</sub>) (Hofman et al.,  
 137 2022). It also provides Temp, RH, and Press (no data was found in regards to environmental sensor model/brand).  
 138 The raw data is transmitted via a multi-band network, and the final data (time res is 5-min) can be accessed through  
 139 their website or via API.

140 The Silax Air (<https://vortexiot.com>) system measures NO<sub>2</sub>, O<sub>3</sub>, PM<sub>10</sub> and PM<sub>2.5</sub>. Their webpage mentions that for  
 141 PM an optical scattering sensor is used and EC sensors for the gases. Further details weren't found. The raw data  
 142 is transmitted via 4G or WiFi and the final user accesses the final product (5-min time res) through API or website.

143 The Node-S system (<https://www.clarity.io>) holds a nephelometer (Plantower PMS6003) to measure 3 PM size  
 144 cuts (PM<sub>1</sub>, PM<sub>2.5</sub>, PM<sub>10</sub>) (Liu et al., 2022) and EC sensors for NO<sub>2</sub> (Alphasense) (Miech et al., 2021). The air is  
 145 dragged into the system by a fan and a Bosch sensor is used for press, RH, and temp. The data is communicated  
 146 to Clarity's cloud via cellular signal (4G) and the final product is ~3-min time res (something unusual for sensor  
 147 systems). Access to the final data is via the web portal or through API.

148 Praxis/Urban (<https://www.southcoastscience.com>) system employs EC sensors for NO, NO<sub>2</sub>, O<sub>3</sub> (Alphasense, A  
 149 series), an NDIR for CO<sub>2</sub> (Alphasense), and particle counter (Alphasense, OPC-N3) for PM<sub>1</sub>, PM<sub>10</sub> and PM<sub>2.5</sub>.  
 150 The Temp/RH is Sensirion and the Press sensor is TDK. The raw data is communicated to the company server  
 151 using 4G and the user can access it and post-processed data through an API (1-min time res).

152 **Table S5. Summary of sensor measurements and the time resolution data provided by participating companies in the**  
 153 **WPS study.**

| <b>System</b> | <b>Measurands</b>                                                                                                      | <b>Time Resol.</b> |
|---------------|------------------------------------------------------------------------------------------------------------------------|--------------------|
| Mod           | PM <sub>1</sub> , PM <sub>2.5</sub> , PM <sub>10</sub>                                                                 | 1min               |
| AQM           | PM <sub>1</sub> , PM <sub>2.5</sub> , PM <sub>10</sub> ,<br>NO, NO <sub>2</sub> , O <sub>3</sub> , CO; CO <sub>2</sub> | 15min              |
| Atm           | PM <sub>1</sub> , PM <sub>2.5</sub> , PM <sub>10</sub>                                                                 | 2min               |
| IMB           | PM <sub>1</sub> , PM <sub>2.5</sub> , PM <sub>10</sub> ,<br>NO <sub>2</sub> , O <sub>3</sub>                           | 1min               |
| Poll          | PM <sub>1</sub> , PM <sub>2.5</sub> , PM <sub>10</sub> ,<br>NO, NO <sub>2</sub> , O <sub>3</sub>                       | 10min              |
| AP            | PM <sub>1</sub> , PM <sub>2.5</sub> , PM <sub>10</sub> ,<br>NO, NO <sub>2</sub> , O <sub>3</sub> , CO; CO <sub>2</sub> | 5min               |

|      |                                                                                                                        |       |
|------|------------------------------------------------------------------------------------------------------------------------|-------|
| SA   | PM <sub>1</sub> , PM <sub>2.5</sub> , PM <sub>10</sub> ,<br>NO <sub>2</sub> , O <sub>3</sub>                           | 5min  |
| NS   | PM <sub>1</sub> , PM <sub>2.5</sub> , PM <sub>10</sub> ,<br>NO <sub>2</sub>                                            | ~5min |
| Prax | PM <sub>1</sub> , PM <sub>2.5</sub> , PM <sub>10</sub> ,<br>NO, NO <sub>2</sub> , O <sub>3</sub> , CO; CO <sub>2</sub> | 1min  |

154

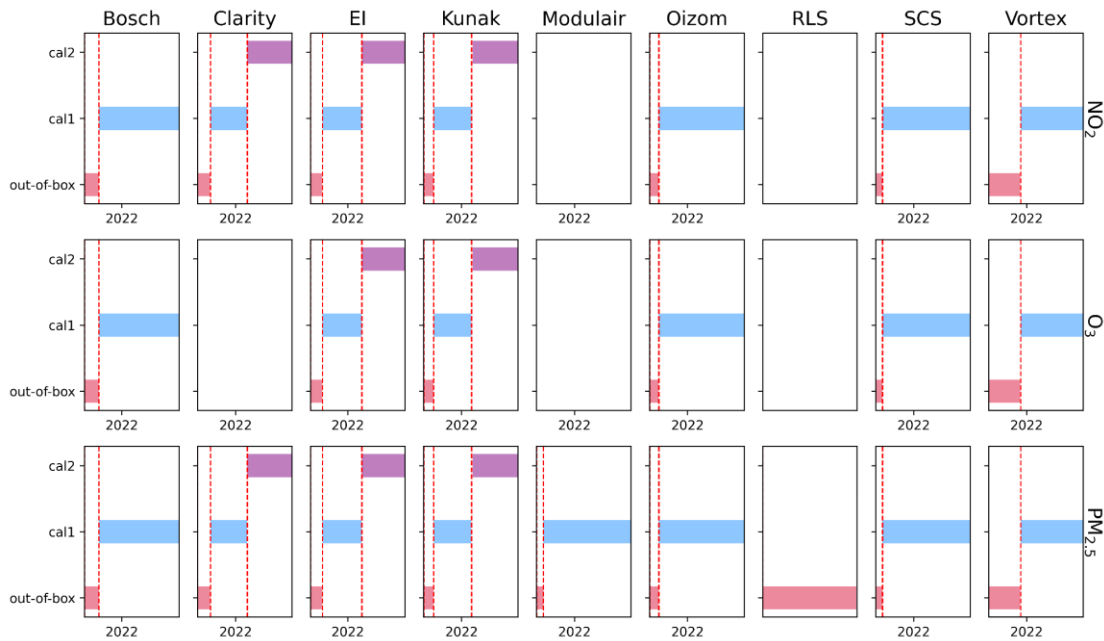

155

156 **Figure S3. Data product for each of the participating companies in the WPS. The top panels are for NO<sub>2</sub>, the middle**  
 157 **panels for O<sub>3</sub> and the bottom panels for PM<sub>2.5</sub>. The y-axis represents the different products: “out-of-box”, cal1 and**  
 158 **cal2. The x-axis shows the dates for which each company provided the mentioned products.**

159 **S5. Performance Metrics**

160 In the assessment of sensor measurement error, it is standard practice to employ a linear additive model, described  
 161 by the following equation:

162 
$$y_i = b_1 x_i + b_0 + \varepsilon_i \tag{1}$$

163 In this model, the dependent variable “y” represents the sensor measurements, while the independent variable “x”  
 164 denotes the reference measurements. The coefficient  $b_1$  corresponds to the slope of the regression line (the  
 165 response sensitivity of the sensor relative to the reference) and  $b_0$  is the ordinate at the origin (the sensor's output  
 166 when the reference measurement is zero).  $\varepsilon_i$ , assumed to have a mean of zero and a standard deviation of  $\sigma_\varepsilon$ ,  
 167 captures the portion of “y” that cannot be explained by “x”. For a sensor to perfectly match the reference  
 168 measurements (i.e.,  $y = x$ ),  $b_1$  would equal one, with both  $b_0$  and  $\varepsilon_i$  being zero.

169

170 **Coefficient of Determination ( $R^2$ )**

171  $R^2$  is an adimensional metric that quantifies the proportion of variance in the sensor measurements (“y”) that can  
172 be explained by its linear relationship with the reference measurements (“x”):

173 
$$R^2 = \frac{\sum_{i=1}^n (x_i - \hat{y})^2}{\sum_{i=1}^n (y_i - \hat{y})^2} \quad (2)$$

174 As a bounded metric,  $R^2$  varies between zero and one ( $0 \leq R^2 \leq 1$ ), where a value closer to one indicates a stronger  
175 linear association between the sensor and reference data. Despite being one of the most widely used metrics in  
176 sensor evaluation, as highlighted by Karagulian et al. (2019),  $R^2$  comes with limitations that warrant careful  
177 consideration. Notably,  $R^2$  does not account for bias in the data; a regression line diverging from the ideal 1:1  
178 relationship between “x” and “y” does not affect its value. Additionally,  $R^2$  is influenced by the dynamic range of  
179 the measurements, which can skew its interpretation. Given these nuances, it is prudent to report  $R^2$  alongside  
180 complementary metrics that can offer a more rounded view of sensor performance. For a more in-depth analysis  
181 of the limitations and proper use of  $R^2$ , readers are directed to the discussion in Legates and McCabe Jr. (1999).

182 **Mean Absolute Error (MAE) and Root Mean Squared Error (RMSE)**

183 MAE and RMSE (both dimensional metrics, expressed in the same units as the measured variable), also stand as  
184 very popular metrics for performance evaluation, as they offer insights into the accuracy of sensors, presenting a  
185 fuller picture than the  $R^2$  alone. These metrics can be estimated as follows:

186 
$$MAE = \frac{1}{n} \sum_{i=1}^n |y_i - x_i| \quad (3)$$

187 
$$RMSE = \sqrt{\frac{1}{n} \sum_{i=1}^n (y_i - x_i)^2} \quad (4)$$

188  
189 However, both MAE and RMSE quantify average errors. MAE does so by calculating the average magnitude of  
190 errors without directionality, utilising absolute differences, while RMSE gauges the standard deviation of these  
191 differences, highlighting the squared differences between sensor readings and reference grade measurements.  
192 Although MAE and RMSE are both valued for their measure of accuracy, they bear distinct implications in  
193 practice. MAE treats all errors equally, allocating proportional weight across the board. Conversely, RMSE  
194 disproportionately penalises larger errors due to its squaring of difference values, an aspect noted by (Willmott  
195 and Matsuura, 2005). This characteristic makes RMSE particularly sensitive to outliers, shaping its utility in  
196 identifying and rectifying significant deviations.

197 **Mean Bias Error (MBE)**

198 The MBE quantifies the average bias in sensor measurements relative to reference values. Expressed in the same  
199 units as the variable being measured, MBE reflects the systematic error, offering a straightforward indication of a  
200 sensor's tendency to overestimate or underestimate the reference:

201 
$$MBE = \frac{1}{n} \sum_{i=1}^n (y_i - x_i) \quad (5)$$

202 A zero value of MBE indicates no consistent over- or underestimation, while positive or negative values signal  
 203 systematic bias in measurement. This simplicity in interpretation makes MBE particularly valuable for initial  
 204 assessments of sensor accuracy and for guiding calibration efforts to correct for systematic bias. However, the  
 205 MBE does not capture the precision of the measurements. For this reason, MBE is most effective when used in  
 206 conjunction with other metrics, such as RMSE and MAE, to gain a comprehensive understanding of sensor  
 207 performance, encompassing both systematic and random errors.

### 208 ***Relative Expanded Uncertainty (REU)***

209 In contrast to single-value metrics such as  $R^2$ , RMSE, and MAE, which assess data sets as a whole, REU offers a  
 210 “point by point” metric. This allows for graphical representations (like the REU in the concentration space or as  
 211 a time series), offering detailed insights into measurement performance variability. The REU’s mathematical  
 212 framework is outlined in the “Guidance for the Demonstration of Equivalence of Ambient Air Monitoring  
 213 Methods” (European Commission, 2010), as follows:

$$214 \quad U(y_i) = \sqrt{\frac{RSS}{n-2} + u^2(x_i) + (y_i - b_0 - b_1x_i)^2} \quad (6)$$

$$215 \quad REU(y_i) = \frac{k \cdot U(y_i)}{\hat{x}} \quad (7)$$

$$216 \quad RSS = \sum_{i=1}^n (y_i - b_0 - b_1x_i)^2 \quad (8)$$

217 here,  $U(y_i)$  represents the measurement uncertainty [concentration units];  $REU(y_i)$  denotes the REU [percentage];  
 218  $u(x_i)$  is the random uncertainty of the reference monitor [concentration units]; “n” stand for the number of  
 219 collocated data points considered; RSS is the Residual Sum of Squares; k is the coverage factor (set at 2 for a 95%  
 220 confidence level).

221 A distinctive feature of REU is its incorporation of the uncertainty associated with the reference method (i.e.,  
 222  $u(x_i)$ ). This aspect recognizes that all measurements, including those from reference methods, are subject to  
 223 inherent uncertainties. While calculating REU is more complex than traditional metrics, it's essential to  
 224 acknowledge that, like any metric, REU is based on specific assumptions and considerations. These factors must  
 225 be thoughtfully evaluated when interpreting data to ensure that conclusions are firmly rooted in the context of the  
 226 study.

### 227 ***Current guidance and normalisation efforts***

228 Table S6 summarises the key metrics addressed in some of the most recent guidance documents and technical  
 229 standards. These metrics have been categorised under various labels: linearity, bias, error, uncertainty, data  
 230 coverage, and inter-sensor precision. Each of these guidelines and regulations has its own set of procedures,  
 231 protocols, and thresholds. Therefore, it is advisable for readers to consult the original documents for a detailed  
 232 understanding of these specificities.

233

234 **Table S6. Summary of field evaluation metrics for sensors according to different guidelines and technical standards.**

| <b>Feature</b>                       | <b>EPA<sup>1&amp;2</sup></b>       | <b>CEN<sup>3</sup></b>                                              | <b>ASTM<sup>4&amp;5</sup></b>                                                                   |
|--------------------------------------|------------------------------------|---------------------------------------------------------------------|-------------------------------------------------------------------------------------------------|
| <b><i>Pollutants covered</i></b>     | PM <sub>2.5</sub> & O <sub>3</sub> | NO <sub>2</sub> , O <sub>3</sub> , CO, SO <sub>2</sub><br>& Bencene | PM <sub>2.5</sub> , PM <sub>10</sub><br>NO <sub>2</sub> , O <sub>3</sub> , CO & SO <sub>2</sub> |
| <b><i>Linearity</i></b>              | R <sup>2</sup>                     | ----                                                                | R <sup>2</sup>                                                                                  |
| <b><i>Bias</i></b>                   | Slope                              | Slope                                                               | Slope                                                                                           |
|                                      | Intercept                          | Intercept                                                           | Intercept                                                                                       |
| <b><i>Error</i></b>                  | ----                               | ----                                                                | MAE                                                                                             |
|                                      | RMSE                               | ----                                                                | RMSE                                                                                            |
|                                      | NRMSE                              | ----                                                                | NRMSE                                                                                           |
| <b><i>Uncertainty</i></b>            | ----                               | REU                                                                 | ----                                                                                            |
| <b><i>Data coverage</i></b>          | Data                               | Data                                                                | Data                                                                                            |
|                                      | completeness                       | Capture                                                             | Capture Rate                                                                                    |
| <b><i>Inter-sensor precision</i></b> | SD                                 | u <sub>(bs,s)</sub>                                                 | S <sub>r,f</sub>                                                                                |
|                                      | CV                                 | ----                                                                | ----                                                                                            |

235 References in the table:

236 <sup>1</sup>EPA/600/R-20/279 Performance Testing Protocols, Metrics, and Target Values for Ozone Air Sensors.

237 <sup>2</sup>EPA/600/R-20/280 Performance Testing Protocols, Metrics, and Target Values for Fine Particulate Matter  
238 Air Sensors.

239 <sup>3</sup>CEN/TS 17660-1: Air quality - Performance evaluation of air quality sensor systems - Part 1 Gaseous  
240 pollutants in ambient air.

241 <sup>4</sup>ASTM D8406-22: Standard Practice for Performance Evaluation of Ambient Outdoor Air Quality Sensors  
242 and Sensor-based Instruments for Portable and Fixed-point Measurement.

243 <sup>5</sup>ASTM WK74812: Standard Specification for Ambient Outdoor Air Quality Sensors and Sensor-based  
244 Instruments for Portable and Fixed-Point Measurement.

245 Acronyms: EPA: U.S. Environmental Protection Agency; CEN: European Committee for Standardization;  
246 ASTM: American Society for Testing and Material. CV: Coefficient of Variation; SD: Standard Deviation  
247 (see the definition in the EPA Performance Testing Protocols); u<sub>(bs,s)</sub>: Between sensor system uncertainty  
248 (see the definition in the CEN TS 17660-1); S<sub>r,f</sub>: field reproducibility standard deviation (see the definition  
249 in the ASTM protocols).

250 **S6. Complementary plots**

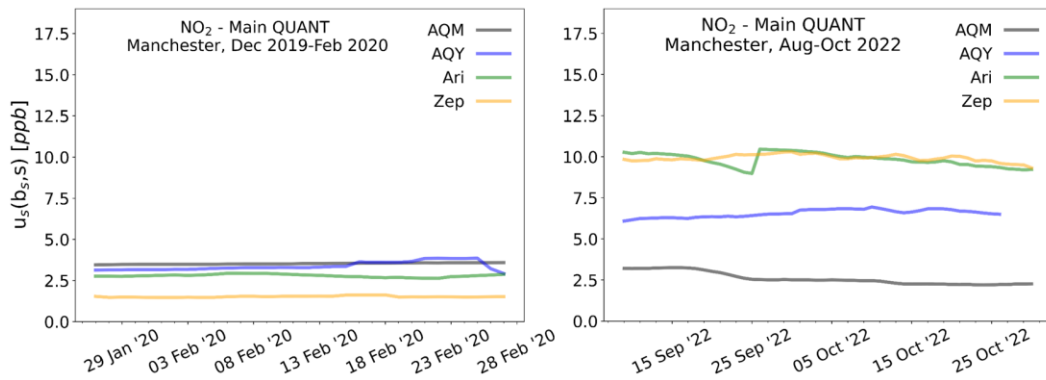

251

252 **Figure S4. Inter-device precision of NO<sub>2</sub> measurements from “identical” devices across the 4 companies**  
 253 **participating in QUANT is assessed using the “between sensor system uncertainty” metric (defined by the CEN/TS**  
 254 **17660-1:2021 as  $u(bs, s)$ ). Each line represents this metric as a composite of all sensors per brand (excluding units**  
 255 **with less than 75% data) within a 40-day sliding window.**

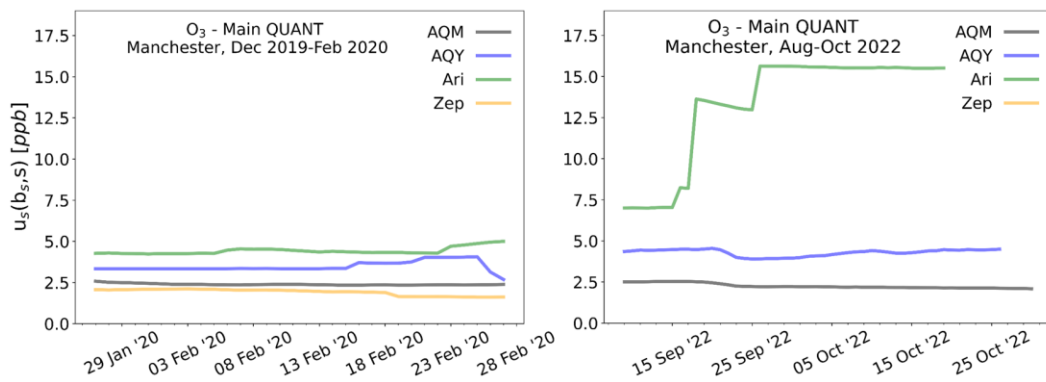

256

257 **Figure S5. The inter-device precision of O<sub>2</sub> measurements from “identical” devices across the 4 companies**  
 258 **participating in QUANT is assessed using the “between sensor system uncertainty” metric (defined by the CEN/TS**  
 259 **17660-1:2021 as  $u(bs, s)$ ). Each line represents this metric as a composite of all sensors per brand (excluding units**  
 260 **with less than 75% data) within a 40-day sliding window.**

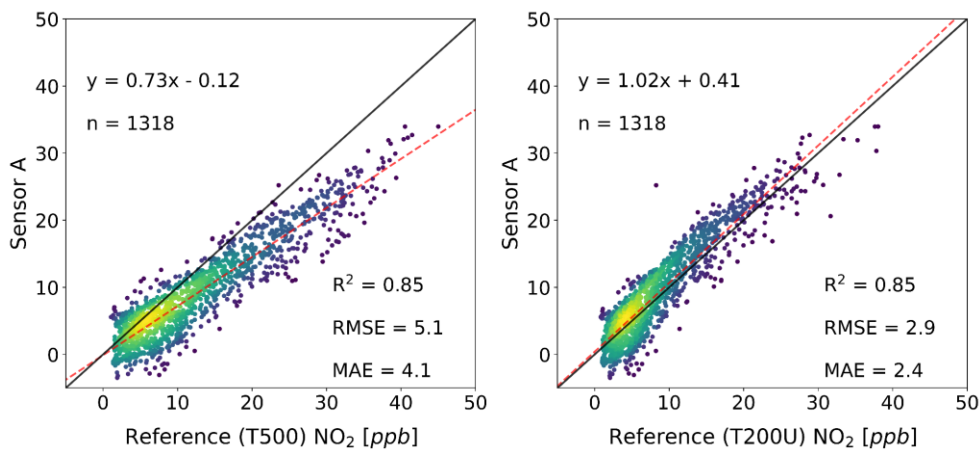

261

262 Figure S6. Comparative analysis of “Sensor A” performance against two reference instruments for NO<sub>2</sub>  
 263 measurements. The left plot shows the correlation with the Teledyne T500 (Cavity Attenuated Phase Shift  
 264 Spectroscopy), while the right plot is against the Teledyne T200U (chemiluminescence) and specifically installed at  
 265 the Manchester supersite for the QUANT study. The dashed red line represents the line of best fit for the sensor  
 266 data against each reference, indicating a closer agreement with the T200U (slope=1.02) compared to the T500  
 267 (slope=0.73).

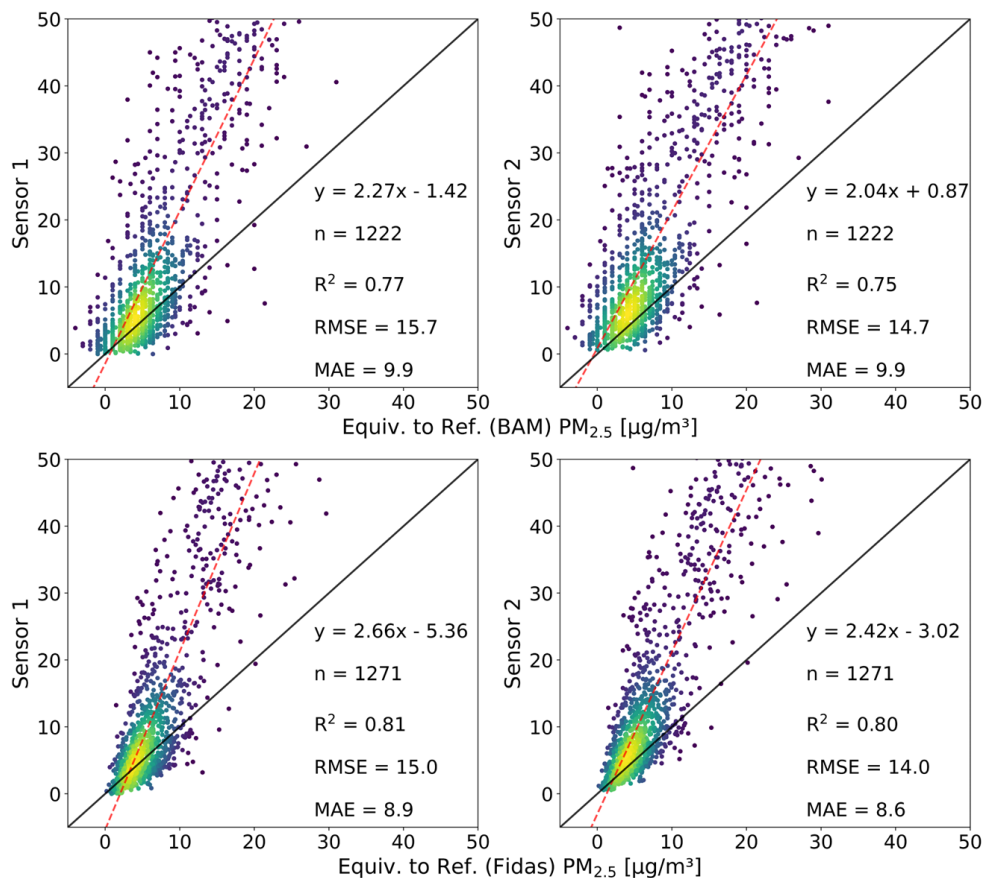

268  
 269 Figure S7. Comparative regression analysis and performance metrics of two distinct PM<sub>2.5</sub> sensor systems  
 270 benchmarked against a BAM for the top plots and a Fidas for the bottom plots. Each plot demonstrates the  
 271 correlation and agreement between the sensor readings and the two equivalent-to-reference instruments in a  
 272 roadside site located in York.

### 273 S7. NO<sub>2</sub> Diffusion tubes

274 A diffusion tube co-location study was carried out between November 2020 and November 2021 at the MAQS,  
 275 LAQS and York sites, using two types of diffusion tubes: the conventional (also known as LAQM, for Local Air  
 276 Quality Management) and UUNN (for UK Urban NO<sub>2</sub> Network). LAQM tubes have an open end and capture  
 277 NO<sub>2</sub> which is converted to nitrite when reacting with triethanolamine (TEA) for subsequent analysis. On the other  
 278 hand, UUNN tubes, similar in the sampling process to LAQM, include an amorphous polyethylene filter at the  
 279 open end to further mitigate the effect of wind on NO<sub>2</sub> measurements. For more details refer to (Butterfield et al.,  
 280 2021). Both types of tubes (conventional and UUNN) were installed in duplicates, either in shelters (to limit the  
 281 incidence of wind) or directly exposed without protection in mounting blocks. Figure S5 illustrates the

282 performance comparison of traditional diffusion tubes and a sensor system in Manchester. The data from these  
283 diffusion tubes have been used to correct the sensor shown here and explained in detail in Section 3.6 (Figures 9b  
284 and 9c).

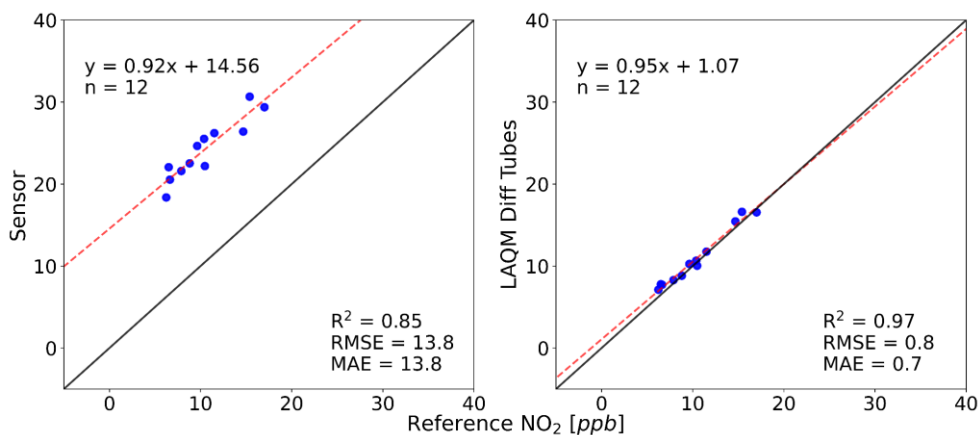

285  
286 **Figure S8.** The left plot displays the correlation between an air quality sensor's readings and those from a reference  
287 monitor for NO<sub>2</sub>, while the right plot demonstrates the LAQM diffusion tube performance. The LAQM plot shows  
288 a tighter correlation with the 1:1 line, indicating a higher accuracy in measuring NO<sub>2</sub> concentrations for the period  
289 Nov 2020 - Nov 2021 at the Manchester supersite (blue dots represent monthly averages).

## 290 References

- 291 Butterfield, D., Martin, N. A., Coppin, G., and Fryer, D. E.: Equivalence of UK nitrogen dioxide diffusion tube  
292 data to the EU reference method, *Atmos. Environ.*, 262, 118614,  
293 <https://doi.org/10.1016/j.atmosenv.2021.118614>, 2021.
- 294 Cross, E. S., Williams, L. R., Lewis, D. K., Magoon, G. R., Onasch, T. B., Kaminsky, M. L., Worsnop, D. R.,  
295 and Jayne, J. T.: Use of electrochemical sensors for measurement of air pollution: correcting  
296 interference response and validating measurements, *Atmospheric Meas. Tech.*, 10, 3575–3588,  
297 <https://doi.org/10.5194/amt-10-3575-2017>, 2017.
- 298 European Commission: Guide to the demonstration of equivalence of ambient air monitoring methods, Report  
299 by an EC Working, Group on Guidance. European Commission, 2010.
- 300 Hofman, J., Peters, J., Stroobants, C., Elst, E., Baeyens, B., Van Laer, J., Spruyt, M., Van Essche, W., Delbare,  
301 E., Roels, B., Cochez, A., Gillijns, E., and Van Poppel, M.: Air Quality Sensor Networks for Evidence-  
302 Based Policy Making: Best Practices for Actionable Insights, *Atmosphere*, 13, 944,  
303 <https://doi.org/10.3390/atmos13060944>, 2022.
- 304 Karagulian, F., Barbieri, M., Kotsev, A., Spinelle, L., Gerboles, M., Lagler, F., Redon, N., Crunaire, S., and  
305 Borowiak, A.: Review of the Performance of Low-Cost Sensors for Air Quality Monitoring,  
306 *Atmosphere*, 10, 506, <https://doi.org/10.3390/atmos10090506>, 2019.



307 Legates, D. R. and McCabe Jr., G. J.: Evaluating the use of “goodness-of-fit” Measures in hydrologic and  
308 hydroclimatic model validation, *Water Resour. Res.*, 35, 233–241,  
309 <https://doi.org/10.1029/1998WR900018>, 1999.

310 Liu, G., Moore, K., Su, W.-C., Delclos, G. L., Gimeno Ruiz de Porras, D., Yu, B., Tian, H., Luo, B., Lin, S.,  
311 Lewis, G. T., Craft, E., and Zhang, K.: Chemical explosion, COVID-19, and environmental justice:  
312 Insights from low-cost air quality sensors, *Sci. Total Environ.*, 849, 157881,  
313 <https://doi.org/10.1016/j.scitotenv.2022.157881>, 2022.

314 Meyer, M., Afshar-Mohajer, N., Cross, E., and Mudgett, P.: Feasibility of using Low-Cost COTS Sensors for  
315 Particulate Monitoring in Space Missions, 2022.

316 Miech, J. A., Stanton, L., Gao, M., Micalizzi, P., Uebelherr, J., Herckes, P., and Fraser, M. P.: Calibration of  
317 Low-Cost NO<sub>2</sub> Sensors through Environmental Factor Correction, *Toxics*, 9, 281,  
318 <https://doi.org/10.3390/toxics9110281>, 2021.

319 Myklebust, H., Aarhaug, T. A., and Tranell, G.: Use of a Distributed Micro-sensor System for Monitoring the  
320 Indoor Particulate Matter Concentration in the Atmosphere of Ferroalloy Production Plants, *JOM*, 74,  
321 4787–4797, <https://doi.org/10.1007/s11837-022-05487-7>, 2022.

322 Oizom - Polludrone Smart: <http://www.aqmd.gov/aq-spec/sensordetail/oizom---polludrone-smart>, last  
323 access: 27 January 2023.

324 Ouimette, J. R., Malm, W. C., Schichtel, B. A., Sheridan, P. J., Andrews, E., Ogren, J. A., and Arnott, W. P.:  
325 Evaluating the PurpleAir monitor as an aerosol light scattering instrument, *Atmospheric Meas. Tech.*,  
326 15, 655–676, <https://doi.org/10.5194/amt-15-655-2022>, 2022.

327 Puttaswamy, N., Sreekanth, V., Pillarisetti, A., Upadhya, A. R., Saidam, S., Veerappan, B., Mukhopadhyay, K.,  
328 Sambandam, S., Sutaria, R., and Balakrishnan, K.: Indoor and Ambient Air Pollution in Chennai, India  
329 during COVID-19 Lockdown: An Affordable Sensors Study, *Aerosol Air Qual. Res.*, 22, 210170,  
330 <https://doi.org/10.4209/aaqr.210170>, 2022.

331 Weissert, L. F., Alberti, K., Miskell, G., Pattinson, W., Salmond, J. A., Henshaw, G., and Williams, D. E.: Low-  
332 cost sensors and microscale land use regression: Data fusion to resolve air quality variations with high  
333 spatial and temporal resolution, *Atmos. Environ.*, 213, 285–295,  
334 <https://doi.org/10.1016/j.atmosenv.2019.06.019>, 2019.

335 Westgate, S. and Ng, N. L.: Using in-situ CO<sub>2</sub>, PM<sub>1</sub>, PM<sub>2.5</sub>, and PM<sub>10</sub> measurements to assess air change  
336 rates and indoor aerosol dynamics, *Build. Environ.*, 224, 109559,

337 <https://doi.org/10.1016/j.buildenv.2022.109559>, 2022.

338 Willmott, C. J. and Matsuura, K.: Advantages of the mean absolute error (MAE) over the root mean square error  
339 (RMSE) in assessing average model performance, *Clim. Res.*, 30, 79–82,  
340 <https://doi.org/10.3354/cr030079>, 2005.

341 Zauli-Sajani, S., Marchesi, S., Boselli, G., Broglia, E., Angella, A., Maestri, E., Marmiroli, N., and Colacci, A.:  
342 Effectiveness of a Protocol to Reduce Children’s Exposure to Particulate Matter and NO<sub>2</sub> in Schools  
343 during Alert Days, *Int. J. Environ. Res. Public. Health*, 19, 11019,  
344 <https://doi.org/10.3390/ijerph191711019>, 2022.
